1 **In turkeys, unlike chickens, the non-structural NS1 protein does not play a**  
2 **significant role in the replication and tissue tropism of the H7N1 avian influenza**  
3 **virus**

4 **Maryna Kuryshko<sup>a</sup>, Maria Landmann<sup>b</sup>, Christine Luttermann<sup>c</sup>, Reiner Ulrich<sup>b</sup>,**  
5 **and Elsayed M. Abdelwhab<sup>a#</sup>**

6 <sup>a</sup>Institute of Molecular Virology and Cell Biology, Friedrich-Loeffler-Institut, Federal  
7 Research Institute for Animal Health, Greifswald-Insel Riems, Germany

8 <sup>b</sup>Institute of Veterinary Pathology, Faculty of Veterinary Medicine, Leipzig University,  
9 Leipzig, Germany

10 <sup>c</sup>Institute of Immunology, Friedrich-Loeffler-Institut, Federal Research Institute for  
11 Animal Health, Greifswald-Insel Riems, Germany

12

13 # Corresponding author: Elsayed M. Abdelwhab

14 Tel: +49 38351 7 1139

15 Fax: +49 38351 7 1188

16 [Sayed.abdel-whab@fli.de](mailto:Sayed.abdel-whab@fli.de); [sayedabdelwhab@yahoo.com](mailto:sayedabdelwhab@yahoo.com)

|             |           |      |
|-------------|-----------|------|
| Word counts | Abstract: | 250  |
|             | Text:     | 4207 |
| Figures     |           | 6    |
| Tables      |           | 1    |

17 **Abstract**

18 The economic losses caused by high pathogenicity (HP) avian influenza viruses (AIV)  
19 in poultry industry worldwide are enormous. Although chickens and turkeys are two  
20 closely related Galliformes, turkeys are thought to be a bridging host for the adaptation  
21 of AIV from wild birds to poultry because of their high susceptibility to AIV infections.  
22 HPAIV evolve from low pathogenicity (LP) AIV after circulation in poultry through  
23 mutations in different viral proteins, including the non-structural protein (NS1), a major  
24 interferon (IFN) antagonist of AIV. At present, it is largely unknown whether the  
25 virulence determinants of HPAIV are the same in turkeys and chickens. Previously, we  
26 showed that mutations in the NS1 of HPAIV H7N1 significantly reduced viral replication  
27 in chickens in vitro and in vivo. Here, we investigated the effect of NS1 on the  
28 replication and virulence of HPAIV H7N1 in turkeys after inoculation with recombinant  
29 H7N1 carrying a naturally truncated wild-type NS1 (with 224 amino-acid "aa" in length)  
30 or an extended NS1 with 230-aa similar to the LP H7N1 ancestor. There were no  
31 significant differences in multiple-cycle viral replication or in the efficiency of NS1 to  
32 block IFN induction in cell culture. Similarly, all viruses were highly virulent in turkeys  
33 and replicated at similar levels in various organs and swabs collected from inoculated  
34 turkeys. These results suggest that NS1 does not play a role in the virulence or  
35 replication of HPAIV H7N1 in turkeys and further indicate that the genetic determinants  
36 of HPAIV differ in these two closely related galliform species.

37

38

39 **Keywords**

40 Virulence determinants, avian influenza virus, turkeys, NS1, interferon, replication,  
41 tissue tropism

## 42 Introduction

43 Avian influenza viruses (AIV) belong to the family *Orthomyxoviridae* and the genus  
44 Influenza A virus (IAV). AIV are further subdivided into 16 HA and 9 NA subtypes  
45 according to variations in the surface glycoprotein, haemagglutinin (HA or H) and  
46 neuraminidase (NA or N). AIV infect a wide range of bird species. Wild birds are the  
47 natural reservoir for AIV. Infection of wild birds with AIV is, with rare exceptions,  
48 asymptomatic, while in poultry it can cause high mortality with huge economic impact.  
49 AIV usually has two types of pathogenicity: low pathogenicity (LP) and high  
50 pathogenicity (HP) forms <sup>1</sup>. HPAIV H5 and H7 subtypes evolve from LP ancestors by  
51 acquisition of point mutations in different proteins or by reassortment (swapping) of  
52 gene segments between two different AIVs infecting the same cell <sup>1</sup>. Although the  
53 acquisition of a polybasic cleavage site in HA is a major determinant of AIV  
54 pathogenicity <sup>2</sup>, other genes contribute to the virulence and pathogenesis of HPAIV <sup>3</sup>.  
55 Compared to chickens, very little is known about the genetic determinants for  
56 replication and virulence of HPAIV in turkeys, the second most kept poultry species in  
57 Europe and USA after chickens.

58 Non-structural protein 1 (NS1) has been described to contribute to virulence in  
59 chickens and ducks <sup>4, 5</sup>. NS1 is encoded by the shortest segment of the AIV genome  
60 with a typical length of 230 amino acids (aa). NS1 is a multifunctional protein consisting  
61 of an RNA binding domain (RBD) linked by a short linker (LR) to an effector domain  
62 (ED) <sup>6</sup>. The RBD of the NS1 protein binds to different types of RNA, preventing the  
63 activation of host cell sensors for foreign viral RNAs. The ED is responsible for  
64 interacting with various host factors via multiple motifs to trigger different pathways of  
65 the innate immune response following AIV infection <sup>7, 8</sup>. Variations in stop codons in  
66 the ED, resulting in truncation of the carboxyl terminus (CTE), may lead to variations  
67 in the size of NS1. Truncation of CTE of NS1 has been described to affect its main  
68 function, interferon antagonism <sup>7, 8</sup>. In 1999, H7N1 LPAIV emerged in March and  
69 HPAIV in December in Italy. Several genetic changes accompanied the shift to HPAIV  
70 and have been described previously <sup>9</sup>. Truncation of 6-aa in the NS1 CTE and three  
71 mutations in the ED accompanied the evolution of the Italian HPAIV H7N1. Previously,  
72 we showed that the extension of the NS1 of the Italian HPAIV H7N1 (from 224-aa to  
73 230-aa, similar to the LP precursor) reduced HPAIV replication and cell/tissue tropism

74 in chickens [10](#). Likewise, reduced virulence was observed in chicken embryos [11](#).  
75 Although turkeys were the most affected species among the 13 million dead birds  
76 during the Italian outbreak [12](#), little is known about the effect of NS1 CTE truncation on  
77 AIV virulence in turkeys. Here, we investigated the effect of NS1 length variation on  
78 virus replication *in vitro* and virulence and transmission in experimentally inoculated  
79 turkeys.

80

## 81 **Results**

82 **Sequence analysis suggested that turkeys, unlike chickens, are infected with**  
83 **H7N1 AIV carrying variable NS1 with different lengths.** We analyzed the NS1  
84 sequences of Italian H7N1 available in the GISAID on 16-01-2024 (n= 124) isolated  
85 from turkeys (n= 71), chickens (n= 35) and other birds (n= 18). As previously reported  
86 [9, 10](#), all H7N1 LPAIV in 1999 contained the full-length NS1 with 230-aa. Interestingly,  
87 we found that almost all non-turkey isolates in 2000 contained a short NS1 with 224-  
88 aa in length. Conversely, turkey isolates in 2000 (n= 27) showed variations in the NS1  
89 length and possessed NS1 with 230-aa (n= 1/27, an LP), 224-aa (n= 14/27), 220-aa  
90 (n=11/27) or 202-aa (n=1/27) (Fig. 1A). *These results suggest that, in contrast to*  
91 *chickens, there may be no positive selection or advantage for NS1 CTE variations*  
92 *occurred in H7N1 isolated from turkeys.*

93 **Recombinant viruses and mutants.** To assess the effect of NS1 length variation on  
94 the fitness of the Italian HPAIV H7N1, we used 3 recombinant viruses, generated in a  
95 previous study [10](#). Each of these viruses contains 7 gene segments (segments 1 to 7)  
96 of the Italian H7N1 HPAIV and variable NS segments (Fig. 1B): HP-NS224 (contains  
97 NS from HP with NS1 of 224-aa length), HP-NS230 (NS from HP with extended CTE  
98 similar to LP NS1) and HP-NSLP (contains NS from LP virus with 230aa length and 3-  
99 aa substitutions in the ED: V117A, V136I and D139I). Prior to use, all viruses were  
100 sequenced and found to have no undesirable mutations.

101 **NS1 did not significantly affect multi-cycle replication of HPAIV H7N1 in primary**  
102 **turkey cells.** A previous study showed that NS1 CTE and ED affected the replication  
103 of an Italian H7N1 virus in chicken cells [11](#), while another study did not find any  
104 difference in the replication of LP H7N1 with similar NS1-230 or NS1-224 in chicken

105 or duck cells [13](#). Here, we investigated the influence of NS1 on HPAIV H7N1 replication  
106 in freshly prepared primary turkey embryo kidney (TEK) cells infected at a multiplicity  
107 of infection (MOI) of 0.001 for single cycle (8 hours post infection "hpi") and multiple  
108 cycle replication (24, 48 and 72 hpi) (Fig. 1C). Virus titer was determined by plaque  
109 assay on MDCKII cells. All viruses reached their maximum replication rate at 24 hpi.  
110 There were no significant differences in virus titers 24, 48 or 72 hpi. At 8 hpi, HP-NSLP  
111 had a significantly lower titer compared to HP-NS224 and HP-NS230 ( $p < 0.01$ ). *These*  
112 *results indicate that NS1 did not significantly affect the multiple-cycle replication of*  
113 *HPAIV H7N1 in primary turkey cells.*

114 **Variations in the NS1 protein did not significantly affect NS1 expression levels**  
115 **in primary turkey cells.** To assess the effect of changes in CTE or ED on the  
116 expression of NS1 in turkey cells, TEK cells were infected with HP-NS224, HP-NS230  
117 or HP-NSLP at a MOI of 0.1 pfu for 24 h (Fig. 1D-E). Cell lysates were prepared and  
118 protein expression was assessed by Western blot. GAPDH protein and H7N1  
119 nucleoprotein (NP) were used as internal controls. As expected, the molecular mass  
120 of NS1 correlated with the length of the NS1 protein. However, *there were no*  
121 *significant differences in the expression levels of the NS1 variants in TEK cells under*  
122 *these experimental settings.*

123 **All NS1 proteins were comparably efficient at blocking IFN- $\alpha$  and IFN- $\beta$  mRNA**  
124 **induction in cell culture.** Previous reports indicated that HPAIV NS1 was more  
125 efficient at inhibiting IFN-induction of similar Italian HPAIV H7N1 in chicken fibroblast  
126 cells [\[16\]](#). To investigate whether the length of NS1 had an effect on the IFN  
127 antagonism of our H7N1 viruses, we used a Firefly-luciferase reporter assay after  
128 transfection of human (HEK293T) and avian (DF1) cells (Fig. 2). Attempts to transfect  
129 primary TEK cells were unsuccessful. Data were normalized to signals induced in cells  
130 transfected with empty vectors. *All three NS1 pCAGGS expression plasmids were*  
131 *comparably efficient in blocking IFN- $\alpha$  and IFN- $\beta$  mRNA induction in cells triggered by*  
132 *various avian and human factors like MDA5, Trif or IRF7.*

133 **Variations in NS1 did not significantly affect the high virulence or**  
134 **transmissibility of H7N1 AIV in turkeys.** Previous studies have shown that NS1  
135 mutations reduce the virulence of an H5N1 HPAIV in chickens [5](#), [14](#), while others have  
136 found no variations in the high virulence of H7N1 in chickens [10](#). Furthermore, no data

137 are available on the influence of NS1 on the transmission of HPAIV in turkeys.  
138 Therefore, we oculonasally inoculated 6-week-old turkeys (n=10) with recombinant  
139 HPAIV H7N1 and 1-day post inoculation (dpi) naïve turkeys (n=5) were added to each  
140 group to assess turkey-to-turkey transmission. Morbidity, mortality and clinical scores  
141 (ranging from 0 = avirulent to 3 = highly virulent) were recorded daily for 10 days (Table  
142 1; Fig. 3A, B). Almost all birds developed clinical signs such as ruffled feathers, mild  
143 depression and neurological disorders starting 2 dpi and progressed moderately 3 dpi.  
144 All HP-NSLP-inoculated birds had died 4 dpi and all HP-NS230 and HP-NS224-  
145 inoculated groups had died 5 dpi. The contact birds in all three groups started to show  
146 clinical signs 3 dpi and were dead 5 dpi in the HP-NSLP and HP-NS230 groups and 6  
147 dpi in the HP-NS224 group. No significant difference in pathogenicity index (PI) was  
148 observed for all viruses, with mean clinical scores of 2.44, 2.42 and 2.48, respectively  
149 (Table 1; Fig. 3A, B). *Taken together, NS1 did not significantly affect the high virulence*  
150 *or efficient transmission of HPAIV H7N1 in turkeys.*

151 **NS1 did not affect viral shedding in primary infected turkeys, but extension of**  
152 **NS1 CTE increased viral shedding in co-housed turkeys.** Our previous experiment  
153 in chickens [10](#) clearly showed that HP-NS1 extension reduced HPAIV H7N1 shedding  
154 and suggested a role for NS1 in virus transmission in chickens. We therefore  
155 measured infectious virus in cloacal and oropharyngeal swabs 2 and 4 dpi. The  
156 inoculated turkeys shed comparable amount of virus at 2 and 4 dpi with no statistical  
157 differences between groups. In the sentinel turkeys, virus titers were comparable to  
158 those of the primary inoculated birds 4 dpi. The only significant difference was that  
159 HP-NS230 was shed in the oropharyngeal swabs at significantly higher levels (~10  
160 times higher) than HP-NS224 at 4 dpi (Fig. 3C-F). *Collectively, these results suggest*  
161 *that NS1 did not significantly affect virus replication in primarily inoculated turkeys or*  
162 *transmission to co-housed turkeys.*

163 **NS1 did not greatly affect the histopathological lesions or tropism in inoculated**  
164 **turkeys.** To assess the distribution of H7N1 matrix 1 (M1) antigen as an indicator for  
165 virus replication, organ samples collected 4 dpi were subjected to  
166 immunohistochemical examination (Fig. 4) similar to our previous chicken experiment  
167 [10](#). No tropism to blood vessel endothelium was observed in any of the turkeys, except  
168 for a few focal signals, mostly in the nasal cavity of HP-NS224 and HP-NSLP

169 inoculated turkeys (Fig. 4A). Conversely, semiquantitative assessment of M1 protein  
170 showed for all three viruses comparable, often multifocal or diffuse distribution of  
171 antigen in the parenchyma of different organs such as brain, heart, kidney, pancreas  
172 and trachea, but no or only rarely focal parenchymal antigen in the duodenum,  
173 proventriculus, liver, lung or skin (Fig. 4B, Fig. 5). The distribution of M1 antigen in  
174 cardiomyocytes was more widespread in HP-NS230 than in the other two groups (Fig.  
175 4B). For all three viruses, similar levels of necrosis were also observed mainly in the  
176 brain, heart, kidney, nasal cavity, pancreas and trachea, ranging from mild to severe  
177 (Fig. 4C). Depletion was observed in lymphoid organs in all turkeys examined,  
178 particularly in those inoculated with HP-NSLP, followed by HP-NS230 and HP-NS224  
179 (Fig. 4D). *These results indicate that variations in NS1 did not significantly affect virus*  
180 *distribution or histopathological changes in the major organs (e.g. brain, heart, kidney,*  
181 *spleen), which is consistent with clinical examination.*

182 **Co-localization of NS1 and M1 in the brain of H7N1 infected turkeys.** To date, NS1  
183 as a non-structural protein is not considered to be part of the infectious virion and no  
184 data are available on the expression or distribution of NS1 in infected birds. As a proof  
185 of principle, we sought to identify NS1 in the brain of HP-NS224 infected turkeys at 4  
186 dpi using immunofluorescence (Fig. 6A-D). Interestingly, multiple foci of M1 and NS1  
187 antigen expression were detected in the brain. Higher magnification showed  
188 simultaneous M1 and NS1 expression in neurons, which were clearly identifiable by  
189 their characteristic morphology (Fig. 6B). NS1 expression was equally strong in the  
190 cytoplasm and nucleus (Fig. 6C), whereas M1 expression tended to be stronger in the  
191 nucleus (Fig. 6D). The NS1 signal was stronger and better discriminated from the  
192 autofluorescent background than the M1 signal in the immunofluorescence  
193 experiment. Simultaneously processed heart, spleen and lung tissues showed  
194 overwhelming autofluorescence due to high amounts of erythrocytes, preventing  
195 reliable analysis of these tissues by immunofluorescence (data not shown). These  
196 results indicate that, similar to the M1 antigen, NS1 expression is stable in the brain of  
197 H7N1 inoculated turkeys 4 dpi and can be used for in vivo experiments (e.g. to study  
198 interaction with host factors in vivo).

## 199 Discussion

200 Turkeys and chickens are Galliformes and are highly susceptible to AIV infection [15](#).  
201 Because of their higher susceptibility to AIV infection than chickens, particularly to H7  
202 viruses [16, 17](#), turkeys play an important role in the adaptation of AIVs of wild bird origin  
203 to poultry [18, 19](#). In contrast to ducks, chickens and turkeys usually die after HPAIV  
204 infection. Therefore, it has been suggested that virulence determinants and virus-host  
205 interactions in AIV-infected turkeys are likely to be similar to those in chickens.  
206 However, we have recently shown that virulence determinants located in the HA of two  
207 different H7 viruses are different in chickens and turkeys [20, 21](#). No data are available  
208 on the role of NS1 in AIV fitness in turkeys. A few studies have shown that mutations  
209 in the NS1 of H7Nx, particularly in ED or CTE, affect virus fitness in chicken embryos  
210 [11](#), chickens [13, 22-26](#) and ducks [13, 27](#).

211 In the current in vitro experiments, we found no significant differences in multiple-cycle  
212 virus replication or NS1 expression in turkey cells. [Soubies, et al. 13](#) found that the 6-  
213 aa truncation associated with transition of the Italian LPAIV H7N1 to HPAIV had no  
214 effect on LP virus replication in duck or chicken in vitro and in vivo. Similarly, all three  
215 NS1s were equally effective in blocking type I IFN mRNA induction in chicken and  
216 human cell lines, which is consistent with the findings of [Soubies, et al. 13](#) who  
217 described comparable levels of type I IFN mRNA induced by similar H7N1 LP carrying  
218 NS230-aa or NS224-aa in chicken and duck cells. Conversely, [Keiner, et al. 11](#) found  
219 that prolongation of the CTE of HPAIV H7N1 NS1 reduced the efficiency of blocking  
220 IFN mRNA induction using a different cell culture and methodology to that used in the  
221 current study. In our previous chicken experiment using the same three viruses, we  
222 found that NS1 elongation reduced virus replication in tissues of infected chickens [10](#).  
223 Conversely, in turkeys we did not observe significant variation in the distribution of the  
224 H7N1 in different organs, further ruling out a role for NS1 as a virulence determinant  
225 in turkeys [21](#), in contrast to chickens or chicken embryos [11, 21](#).

226 Currently, it is widely accepted that NS1 is a non-structural protein that is only  
227 expressed in cells after infection and is not part of the virion. Anti-NS1 antibodies have  
228 been found in the sera of birds experimentally infected with different AIV subtypes,  
229 suggesting that NS1 antibodies could be used for diagnostic purposes [28-30](#). However,  
230 no studies, so far, have reported the detection of NS1 antigen specifically in the brain



231 of turkeys. Our pilot study showed that NS1 antigen can be detected in the turkey  
232 brain, similar to and overlapping with M1, indicating that the virus is replicating in the  
233 neurons. This will be useful in subsequent experiments to further improve our  
234 understanding of the potential role of NS1 *in vivo*, for example, in neurovirulence or  
235 blocking the immune response in the turkey brain.

236 In conclusion, we found that turkeys can be infected with AIV carrying different NS1  
237 lengths and mutations without significant effects on multiple-cycle replication, and NS1  
238 expression *in vitro*, and without affecting the high virulence, efficient transmission and  
239 tissue distribution of HPAIV H7N1 in turkeys. These results are in contrast to our  
240 previous findings in chickens, where NS1 significantly affected virus replication *in vitro*  
241 and *in vivo*. Our results further suggest that the pathogenesis and genetic markers for  
242 adaptation of AIV are different in chickens and turkeys, although they are very closely  
243 related galliform species.

244

## 245 **Material and methods**

246 **Sequence analysis.** NS1 sequences of H7N1 isolated from turkeys and chickens in  
247 Italy in 1999 and 2000 were retrieved from GISAID on 16-01-2024. Sequences with  
248 double entries and identical amino acid sequences were further edited. Alignment was  
249 done using Geneious Prime® Software (Version 2021.0.1) and the MAFFT package.

250 **Cells and recombinant viruses.** Primary turkey embryonic kidney cells (TEK) were  
251 prepared from the kidneys of 21-day old turkey embryos [21](#), [31](#). Human embryonic  
252 kidney 293T (HEK-293T), Madin-Darby canine kidney type II (MDCKII) and chicken  
253 fibroblast (DF1) cell lines were obtained from the Cell Bank of Friedrich-Loeffler-Institut  
254 (FLI). For this study, previously generated recombinant HPAIV H7N1 were used [10](#):  
255 A/chicken/Italy/445/1999 virus carrying the HP NS1 (HP-NS224), the LP NS1 form  
256 A/chicken/Italy/473/1999 virus (LP-NSLP) and the elongated HP NS1 (HP-NS230) [10](#).  
257 Virus stocks were prepared in embryonated chicken eggs (ECE) obtained from  
258 specific-pathogen-free chickens (VALO BioMedia GmbH, Germany). Sequence of the  
259 whole genome of the three viruses was determined as previously done [10](#).

260 **Plasmids.** pCAGGS plasmids carrying the NS inserts of HP-NS224, HP-NS230, and  
261 HP-NSLP were generated in this study. The NS segment was amplified using the  
262 Omniscript RT Kit (Qiagen, Germany) and Phusion® High-Fidelity DNA Polymerase  
263 (New England Biolabs, USA). PCR products were purified on a 1% agarose gel and  
264 extracted using the GeneJET Gel Extraction Kit (Thermo Fisher Scientific, Germany).  
265 The competent *E. coli* XL1-blue strain was transformed and plasmids were isolated  
266 from bacterial cultures using the Plasmid Midi Kit (Qiagen, Germany). Sequencing of  
267 the three NS1 plasmids was performed by Eurofins (Germany).

268 **Luciferase reporter assay.** To determine the efficiency of NS1 in inhibiting the IFN-I  
269 pathway, we conducted luciferase reporter assay as previously described [5]. Briefly,  
270 HEK293T and DF1 cells in 6 well plates were transfected with a plasmid DNA mixture  
271 containing 0.5 µg of a Firefly Luciferase (FFL) expressing reporter plasmids ( i.e. firefly  
272 luciferase reporter plasmids with human or chicken IFN-I promoters:pIFN-β-Pro-FFL,  
273 pIFNα-Pro-FFL), 0.005 µg of pCMV-RL (normalization), 0.2 µg human or chicken  
274 pIRF7 or 0.5 µg human or chicken pMDA5-delta or human pTrif as a trigger expression  
275 plasmid and 0.5 µg of pCAGGS plasmid with one of the NS1 coding sequences or an  
276 empty vector as a control. Lipofectamine™ 2000 (Thermo Fisher) was used for the  
277 transfection according to manufacturer recommendations. At 24 h post-transfection,  
278 cell lysates were harvested and luciferase activity was measured using the Dual-  
279 Luciferase® Reporter Assay System (Promega, USA) according to the manufacturer's  
280 instructions. Firefly and Renilla activity were measured using a TriStar<sup>2</sup> S LB 942  
281 Modular Multimode Microplate Reader (Berthold, Germany). The assay was done in  
282 three independent experiments and results are expressed as normalized means and  
283 standard deviations.

284 **Western blot.** TEK cells, 80% confluent, were infected with viruses (MOI 0.1) for 1h,  
285 washed twice with phosphate-buffered saline (PBS) and overlaid with Ham's  
286 F12/IMDM supplemented with 0.2% bovine serum albumin (BSA, MP Biomedicals,  
287 USA). Cells were harvested at 24 hours post infection (hpi). Samples were centrifuged  
288 at 10,000 rpm for 5 minutes, washed with 0.5 ml PBS, centrifuged at 10,000 rpm for  
289 10 minutes, resuspended in 50 µl of PBS and 50 µl of Laemmli sample buffer 2x, for  
290 SDS-PAGE (Serva, Germany), boiled at 99°C for 10 minutes and stored at -20°C until  
291 further use. Samples were run on 12% SDS-PAGE gel at 200V for 47 minutes, blotted

292 with BioRad Turbo Blotter, blocked with 5% milk overnight. They were stained with  
293 rabbit anti-NS1 polyclonal antibody (kindly provided by Daniel Marc, INRAE, Nouzilly,  
294 France), rabbit anti-NP polyclonal antibody and GAPDH as a cell normalization control  
295 (Abcam, United Kingdom). Blots were developed using the Biorad VersaDoc system  
296 and quantified using Image J software.

297 **Replication kinetics.** Recombinant viruses were assayed for growth rate by infecting  
298 TEK cells at MOI of 0.001 for 1h. The cells were washed twice with PBS and overlaid  
299 with Ham's F12/IMDM medium supplemented with BSA. Plates containing cells were  
300 incubated at 37°C in 5% CO<sub>2</sub> for 1, 8, 24, 48 and 72 hours. Prior to titration by plaque  
301 assay, harvested cells were stored at -80°C.

302 **Plaque assay.** The plaque assay was used for virus titration and virus titers were  
303 expressed as plaque-forming units per mL (PFU/mL). Ten-fold serial dilutions of each  
304 virus were incubated on MDCKII cells in 6-well plates for one hour at 37°C and 5%  
305 CO<sub>2</sub>, washed twice with PBS, 0.9% Bacto Agar/MEM mixture supplemented with 0.2%  
306 BSA (MP Biomedicals, USA) and incubated for 72 hours at 37°C and 5% CO<sub>2</sub>. After  
307 incubation, the plates were fixed with 0.1% crystal violet in 10% formaldehyde solution.  
308 Viral titers were determined by counting the number of plaques under a microscope.

309 **Turkey experiment. Ethical approval:** The animal experiment was performed in the  
310 Biosafety Level 3 (BSL3) facility of the FLI in accordance with the German Animal  
311 Welfare Act after approval by the authorized Ethics Committee of the State Office for  
312 Agriculture, Food Safety and Fisheries of Mecklenburg-Western Pomerania (LALLF  
313 M-V) under registration number 7221.3-1.1-051-12. A total of 45 six-week-old turkeys  
314 were purchased from a farm in Mecklenburg- Western Pomerania. Each recombinant  
315 virus was used to oculonasally infect 10 birds per group at 10<sup>4.5</sup> PFU/bird. After 24 h,  
316 5 naive birds were added to each group. All birds were observed daily for clinical signs  
317 (depression, signs of respiratory distress, diarrhea, cyanosis of the comb, wattles or  
318 shanks, facial edema and neurological signs) over a 10-day observation period.  
319 Clinical scoring followed the standard protocol [33](#) where healthy birds were scored (0),  
320 sick birds with one of the clinical signs were scored (1), severely sick birds with two or  
321 more signs were scored (2) and dead birds were scored (3). Moribund birds unable to  
322 eat or drink were humanely euthanized by inhalation of isoflurane (CP-Pharma,  
323 Germany), exsanguinated and scored as dead on the next observation day. The

324 pathogenicity index (PI) was calculated as the sum of the daily arithmetic means of all  
325 infected birds divided by 10 (the number of observation days), with a final range from  
326 0 (avirulent) to 3 (highly virulent).

327 **Virus shedding.** Oropharyngeal and cloacal swabs were taken from all birds at 2 and  
328 4 dpi. Swabs were stored at -80°C in 1.5 ml Dulbecco's Modified Eagle Medium  
329 (DMEM) containing 1.05 mg enrofloxacin (Baytril, Bayer AG, Germany), 0.525 mg  
330 lincomycin (Mediserv Nord, Germany), 0.105 mg gentamycin (Genta, CP-Pharma,  
331 Germany) in sterile safe-lock Eppendorf tubes, previously mixed by vortexing for 30  
332 seconds. The amount of infectious virus in plaque-forming units was determined by  
333 titration of the swab samples using the plaque assay described above.

334 **Histopathology and immunohistochemistry.** For histopathology and  
335 immunohistochemistry, organ samples were fixed in 4% neutral buffered formaldehyde  
336 for >7 days, processed, embedded in paraffin and sectioned at 2-4 µm. For  
337 histopathology, slides were stained with haematoxylin and eosin.  
338 Immunohistochemistry was performed using the avidin-biotin-peroxidase complex  
339 method (Vectastain PK 6100; Vector Laboratories, Burlingame, CA, USA) with citric  
340 buffer (pH 6.0), a primary mouse monoclonal antibody against influenza A virus matrix  
341 1 protein (M1, ATCC clone M1Hb-64, 1:100), a secondary biotinylated goat anti-mouse  
342 IgG (BA-9200, Vector Laboratories, Newark, USA, 1:200), 3-amino-9-ethylcarbazol as  
343 chromogen, and hematoxylin counterstain as described [13, 18]. Mouse IgG (NBP1-  
344 97019-5mg, Novus Biologicals USA, CO, USA) was used as an isotype control instead  
345 of the primary antibody and validated archival tissues were used as a positive control.

346 Scoring of histopathological lesions and viral antigen distribution was performed as  
347 previously described [36](#). Briefly, necrosis or necrotizing inflammation and lymphoid  
348 depletion were each scored as follows 0 = no, 1 = mild, 2 = moderate, 3 = severe  
349 lesion, and viral antigen distribution was scored as follows: 0 = no, 1 = focal to  
350 oligofocal, 2 = multifocal, 3 = coalescing to diffuse antigen for parenchymal cells and  
351 0 = no antigen, 1 = antigen in single blood vessels, 2 = antigen in multiple blood  
352 vessels, 3 = diffuse immunoreactivity for endothelial cells.

353 **Immunofluorescence double-staining.** An immunofluorescence double-staining  
354 experiment was performed for proof-of-principle of influenza A virus matrix 1 protein

355 (M1) and non-structural protein 1 (NS1) co-expression on the brain of a HP-NS224-  
356 infected turkey (same animal as shown in Fig. 5 A-C), as well as a H4/H5-infected  
357 chicken, and a non-infected chicken from previous studies as positive and negative  
358 controls, respectively. Briefly, 2-4  $\mu\text{m}$  slides of the formalin-fixed paraffin-embedded  
359 specimen were deparaffinized, and sequentially incubated in 0.5% H<sub>2</sub>O<sub>2</sub> in methanol  
360 for 30 minutes for inhibition of endogenous peroxidase, in citric acid buffer (pH 6,0) at  
361 96°C for 25 minutes for unmasking of antigens, in 0,1 % Triton X-100 in Tris buffered  
362 saline (TBS) for 15 minutes for permeabilization, and SuperBlock™ blocking buffer  
363 (Thermo Fisher Scientific, USA) for 30 minutes for blocking excess binding sites.  
364 Afterwards, the slides were incubated with either single or mixed primary antibodies  
365 against M1 (monoclonal mouse anti-M1 antibody (ATCC, clone: M1Hb-64, 1:10) and  
366 NS1 (polyclonal anti-rabbit, 1:1000) at 4°C overnight, followed by incubation with  
367 AlexaFluor 488-conjugated donkey anti-mouse IgG (1:500, Dianova) and AlexaFluor  
368 568-conjugated goat anti-rabbit IgG (1:500, Abcam) secondary antibodies at room  
369 temperature for 1 h. After further washing steps, sections were counterstained using  
370 4',6-diamidino-2-phenylindole (DAPI, 1:300, Invitrogen) and mounted with glycerol-  
371 gelatin aqueous slide mounting medium (Sigma Aldrich). The labelled sections were  
372 analyzed using a motorized Axioplan 2 Imaging fluorescence microscope (Carl Zeiss  
373 Microscopy Deutschland GmbH, Oberkochen) equipped with 25x/0.8 Plan-Neofluar  
374 water-immersion, 40x/1,2 Apochromat water-immersion, and 63x/1,2 Apochromat  
375 water-immersion objectives, an HBO 50 mercury-vapor short-arc lamp, AHF F31-000  
376 (excitation 350/50, emission 460/50, for DAPI), AHF F41-054HQ (excitation 480/30,  
377 emission 527/30 HQ, for AF488), and AHF F41-007HQ (excitation 545/30, emission  
378 610/75 HQ, for AF568) filter sets, and a monochrome 12 megapixel AxioCam 712  
379 mono R2 CMOS camera. Images were acquired using a semi-automated multi  
380 exposure protocol within the ZEN 3.8 software.

381 **Statistic.** Statistical analysis was performed using Graph Pad Prism, Version 10.1.1.  
382 One-way ANOVA was used for analysis of viral titers, expression levels of NS1 and  
383 IFN-induction inhibition. Kruskal-Wallis tests and Mann-Whitney-Wilcoxon tests with  
384 Benjamini-Hochberg correction were used for clinical scoring. Survival analysis was  
385 done by log-rank (Mantel-Cox) test.

386

387 **Acknowledgements**

388 The authors thank Frank Klipp, Doreen Fiedler, Charlotte Schröder, Diana Palme,  
389 Luise Hohensee, David Scheibner and colleagues at the department of experimental  
390 animal facilities and biorisk management, for their valuable assistance with the animal  
391 experiments. Timm C. Harder, FLI and Ilaria Capua, Istituto Zooprofilattico  
392 Sperimentale delle Venezie, Padova, Italy, for providing the viruses. Dajana Helke,  
393 Kristin Trippler, Elfi Quente and Hilke Gräfe for technical assistance. We thank Daniel  
394 Marc for the anti-NS1 antibodies and Stefan Finke for the pCAGGS expression vector.

395 **Data availability**

396 Data will be made available on request

397 **Author contributions**

398 Conceptualization: EMA, Data curation: All authors, Formal analysis: All authors  
399 Funding acquisition: EMA, RU, CL, Investigation: All authors, Methodology: All  
400 authors, Project administration: EMA, Resources; EMA, RU, CL, Software; All authors,  
401 Supervision: EMA, RU, Validation; All authors, Visualization; All authors, Roles/Writing  
402 - original draft: MK, EMA and Writing - review & editing: All authors.

403 **Declaration of interest statement**

404 The authors report there are no competing interests to declare. The work in this study  
405 was funded by Deutsche Forschungsgemeinschaft (DFG) Grants Nr.: AB567 and  
406 ICRAD, an ERA-NET co-funded under the European Union's Horizon 2020 research  
407 and innovation programme (<https://ec.europa.eu/programmes/horizon2020/en>), under  
408 Grant Agreement n°862605 (Flu-Switch) to E.M. Abdelwhab.

409 **Table 1. Virulence of recombinant H7N1 viruses in inoculated and contact**  
410 **turkeys.**

| Viruses  | Inoculated turkeys |      |     | Contact turkeys |     |
|----------|--------------------|------|-----|-----------------|-----|
|          | Mortality          | PI   | MTD | Mortality       | MTD |
| HP-NS224 | 10/10              | 2.44 | 4.2 | 5/5             | 5.4 |
| HP-NS230 | 10/10              | 2.42 | 3.2 | 5/5             | 4.4 |
| HP-NSLP  | 10/10              | 2.48 | 3.5 | 5/5             | 4.2 |

411 Ten turkeys were inoculated with  $10^{4.5}$  pfu/ml of the indicated viruses. To assess bird-  
412 to-bird transmission, 5 naive birds were added to each inoculated group at 1-day  
413 post infection (dpi). Mortality refers to dead animals/total inoculated. Pathogenicity  
414 index (PI) from 0 (avirulent) to 3 (highly virulent) and mean time to death (MTD) per  
415 day after infection was calculated as the sum of daily arithmetic means divided by  
416 10, the number of days observed. MTD in contact turkeys was calculated from the  
417 dpi of the primary inoculated birds.

## 418 Figures and legends

### 419 Fig. 1: Sequence analysis and in vitro characterization of recombinant H7N1 420 viruses.

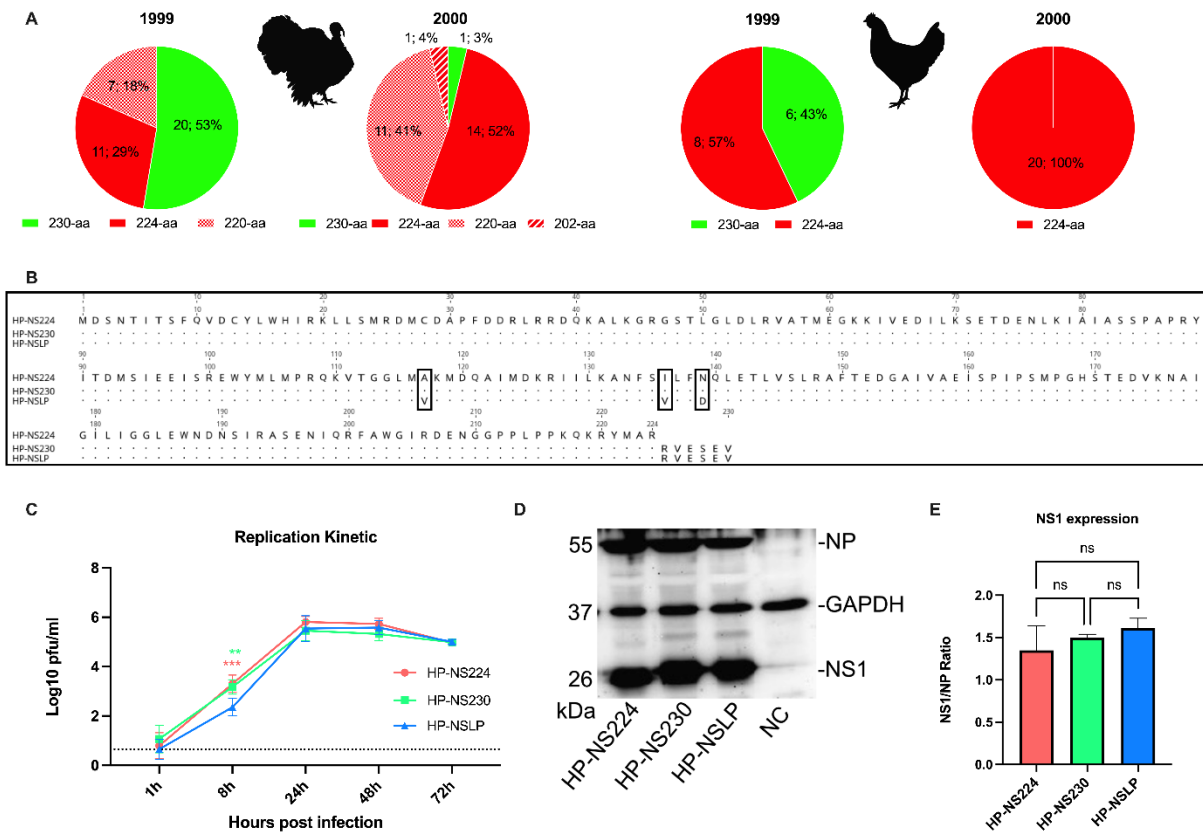

421

422 (A) Sequence analysis of NS1 of H7N1 from turkeys (n= 65) and chickens (n= 28) in  
423 1999-2000 deposited in GISAID (retrieval date 16-01-2024). Variations in NS1 length  
424 are shown as number and percentage of total sequences analyzed in different years.  
425 Sequence analysis was performed using Geneious Prime. (B) Alignment and amino  
426 acid differences of the NS1 protein of the viruses used for this study. (C) Turkey  
427 embryonic kidney (TEK) cells were infected at MOI 0.001 and virus titers were  
428 determined at 1, 8, 24, 48 and 72 h post infection (hpi) by plaque assay performed on  
429 MDCK II cells. Titers were calculated as pfu/ml and are presented as the mean and  
430 standard deviation of three independent experiments performed in duplicate. Data  
431 were analyzed by one-way ANOVA with post hoc Tukey test. Asterisks indicate  
432 significant differences (\*= p < 0.05, \*\*= p < 0.01, \*\*\*= p < 0.001, \*\*\*\*= p < 0.0001); ns=  
433 no significant differences. (D) NS1 protein was detected after infection of TEK cells at  
434 a MOI of 0.1 for 24 h at 37°C. Detection was performed using rabbit polyclonal sera  
435 (D. Marc, INRAE, Nouzilly, France) and ECL substrate. The Western blot image was



436 acquired using Quantity One software version 4.4 (Biorad, Germany). (E) Image J was  
437 used to calculate NS1 expression levels and data are presented as NS1/NP ratio.

438

439 **Fig. 2: Inhibition of type I interferon induction in avian and human cell lines after**  
440 **transfection with H7N1 NS1.**

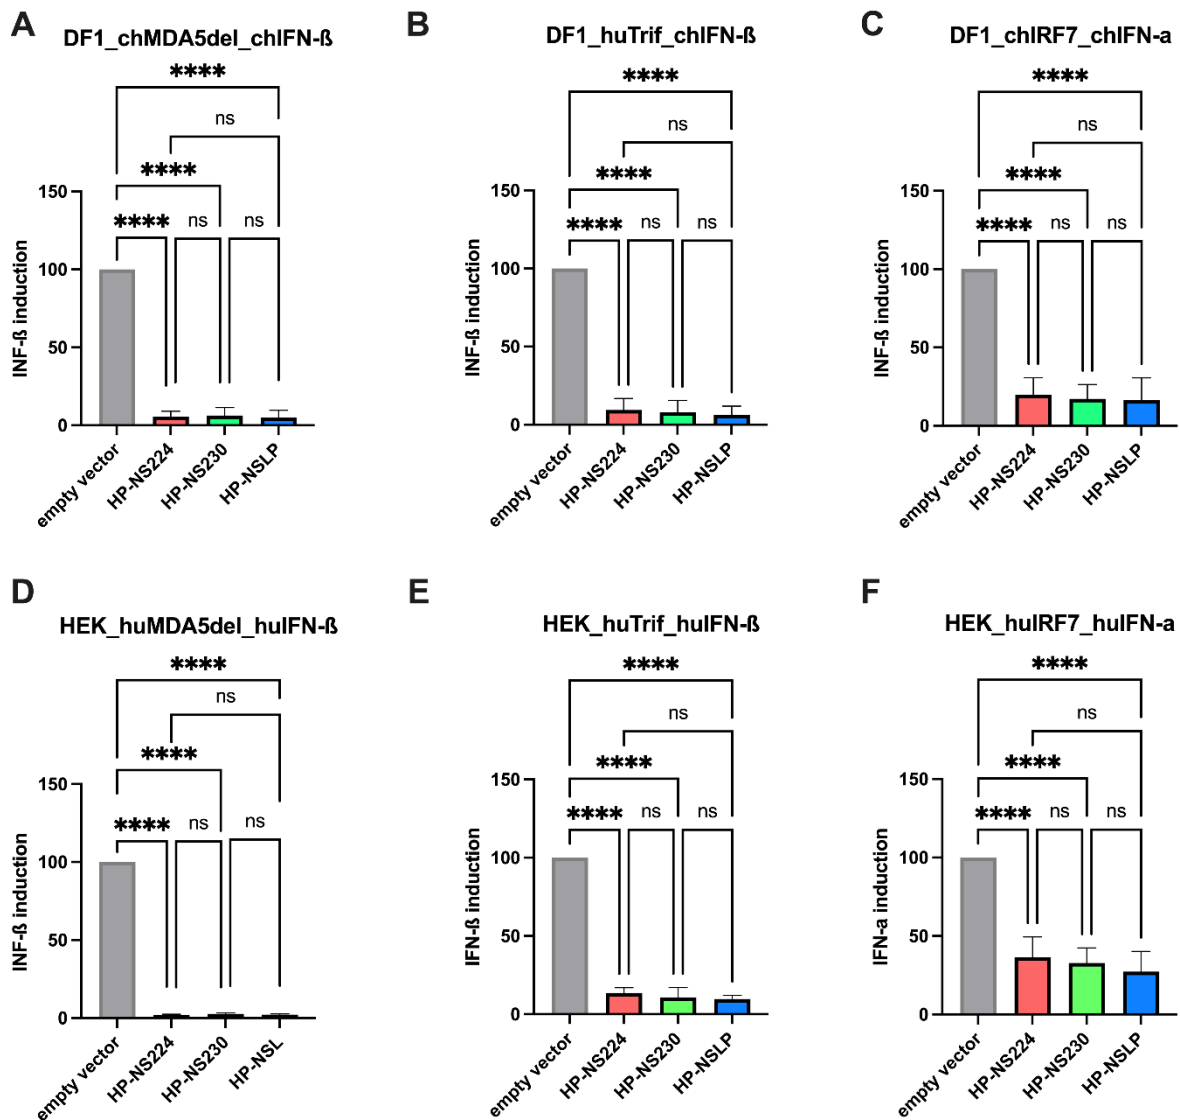

441

442 The efficiency of NS1 to block IFN- $\alpha$  and - $\beta$  mRNA induction was investigated in avian  
443 (DF1) (A-C) and human (HEK293T) (D-F) cells using a double reporter Luciferase  
444 assay. Results are expressed as fold change of IFN-I promotor induction relative to  
445 the signal of the indicated trigger for the empty vector control. Asterisks indicate  
446 significant differences (\*=  $p < 0.05$ , \*\*=  $p < 0.01$ , \*\*\*=  $p < 0.001$ , \*\*\*\*=  $p < 0.0001$ ). ch,  
447 chicken; hu, human; ns= no significant differences.

448 **Fig. 3: Effect of NS1 gene segment on survival and virus shedding after infection**  
449 **of turkeys with recombinant H7N1 viruses.**

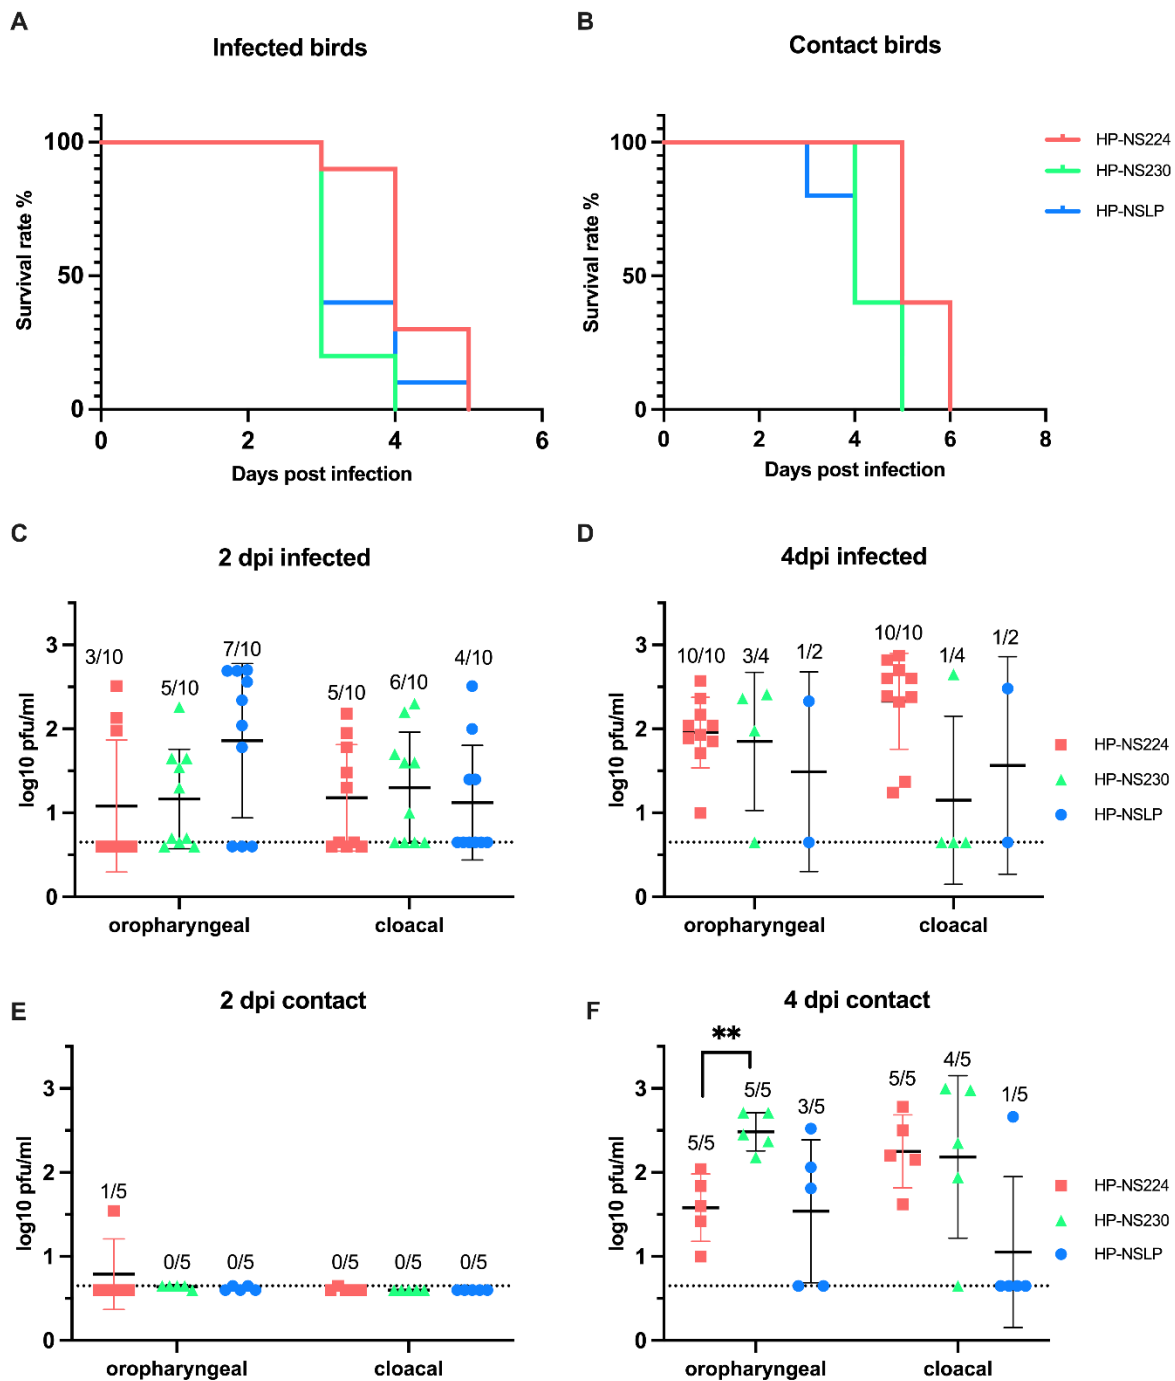

450

451 The survival rate is shown for both inoculated- (A) and contact-turkeys (B). Detection  
452 of viral load in swab samples from infected (C, D) and contact (E, F) birds.  
453 Oropharyngeal and cloacal swabs were collected 2- and 4-days post infection (dpi)  
454 and viral titers were measured by plaque assay using MDCKII cells. Asterisks indicate

455 significant difference, \*\*=  $p < 0.01$ . Dashed lines (C, D, E, F) indicate the predicted  
456 limit of detection of the plaque assay.

457 **Fig. 4: Distribution and pathological findings in H7N1-inoculated turkeys.**

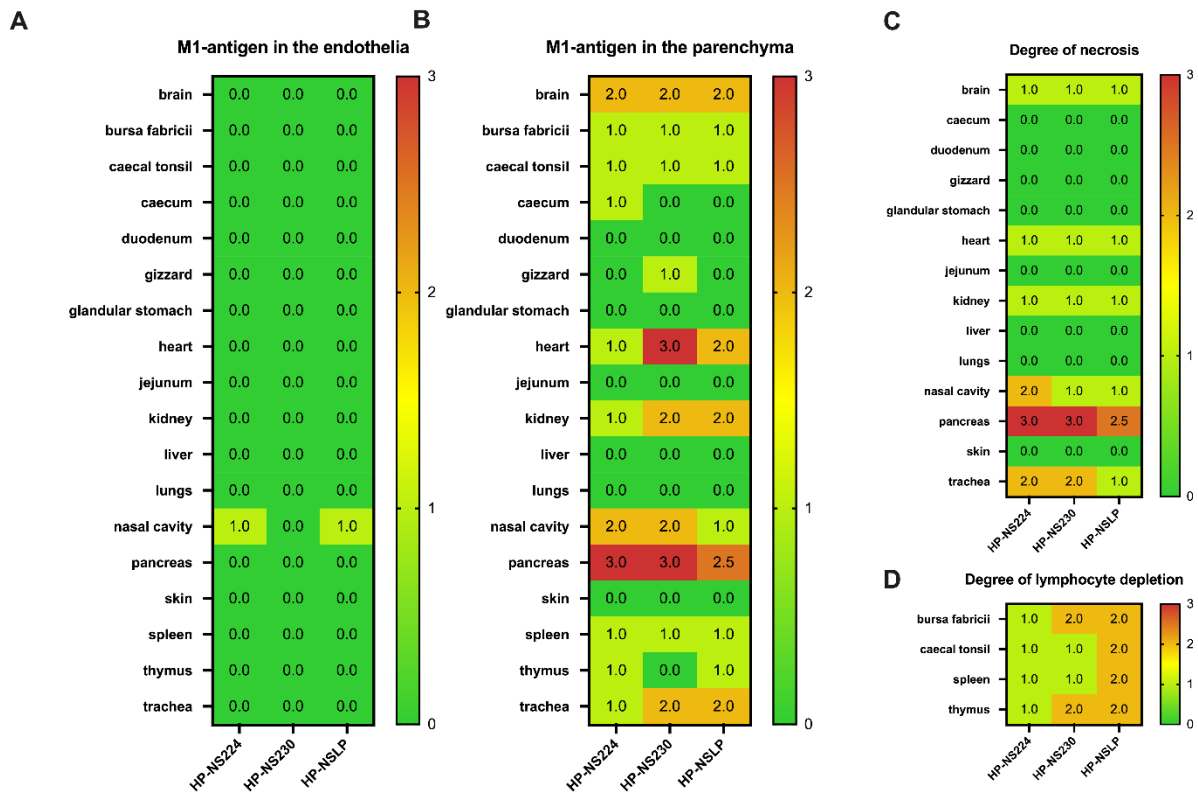

458

459 Samples were collected from inoculated turkeys 4 dpi. M1 antigen distribution was  
 460 assessed semiquantitatively in the endothelial cells (A) and parenchyma (B) of the  
 461 indicated organs. The degree of necrosis (C) and lymphocyte depletion (D) was also  
 462 assessed microscopically. The color of the heatmap corresponds to the median of the  
 463 semiquantitative scores: 0 = no, 1 = mild, 2 = moderate, 3 = severe lesion for necrosis  
 464 and depletion, 0 = no, 1 = focal to oligofocal, 2 = multifocal, 3 = coalescing to diffuse  
 465 antigen for parenchyma and 0 = no antigen, 1 = antigen in single blood vessels, 2 =  
 466 antigen in multiple blood vessels, 3 = diffuse immunoreactivity for endothelial cells.

467 **Fig. 5: Detection of H7N1 matrix 1 protein in selected tissues of inoculated**  
468 **turkeys.**

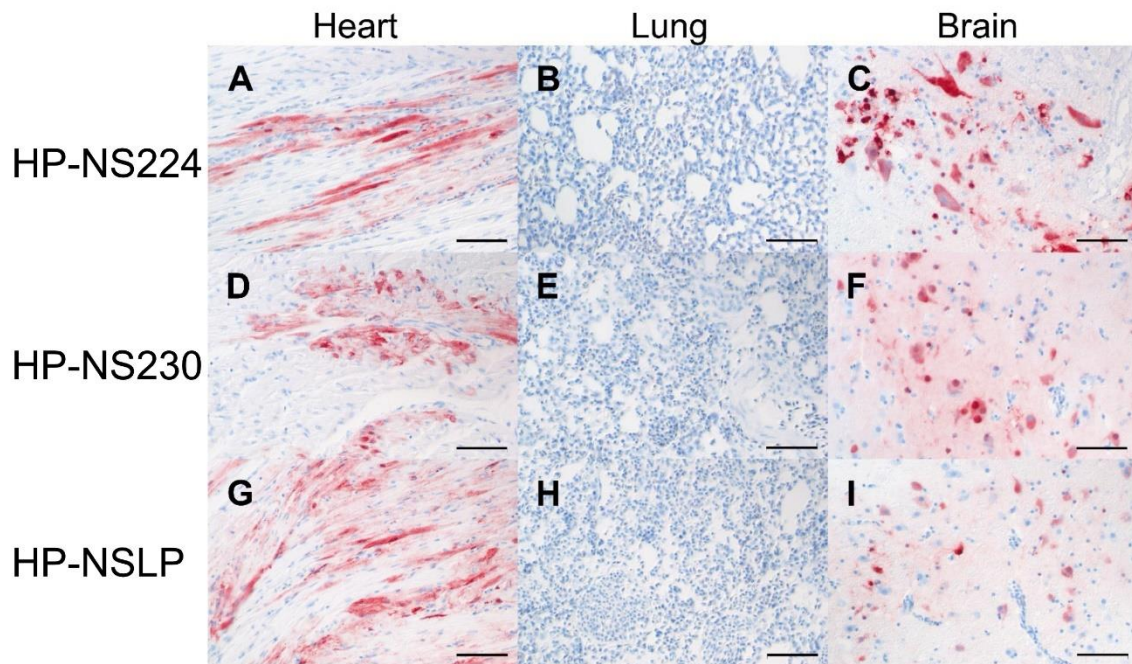

469

470 The maximum distribution of influenza A virus M1 protein 4dpi in heart, lung and brain  
471 of turkeys inoculated with HP-NS224 (A, B, C), HP-NS230 (D, E, F) and HP-NSLP (G,  
472 H, I). Immunohistochemistry was done with the avidin-biotin-peroxidase-complex  
473 method, a primary monoclonal mouse antibody against influenza A virus matrix  
474 protein, 3-amino-9-ethylcarbazol (red-brown) as chromogen and hematoxylin (blue)  
475 as counterstain; Nomarski contrast; Bars = 50  $\mu$ m.

476 **Fig. 6: Co-localization of NS1 and M1 antigens in the brain tissues of H7N1**  
477 **inoculated turkeys.**

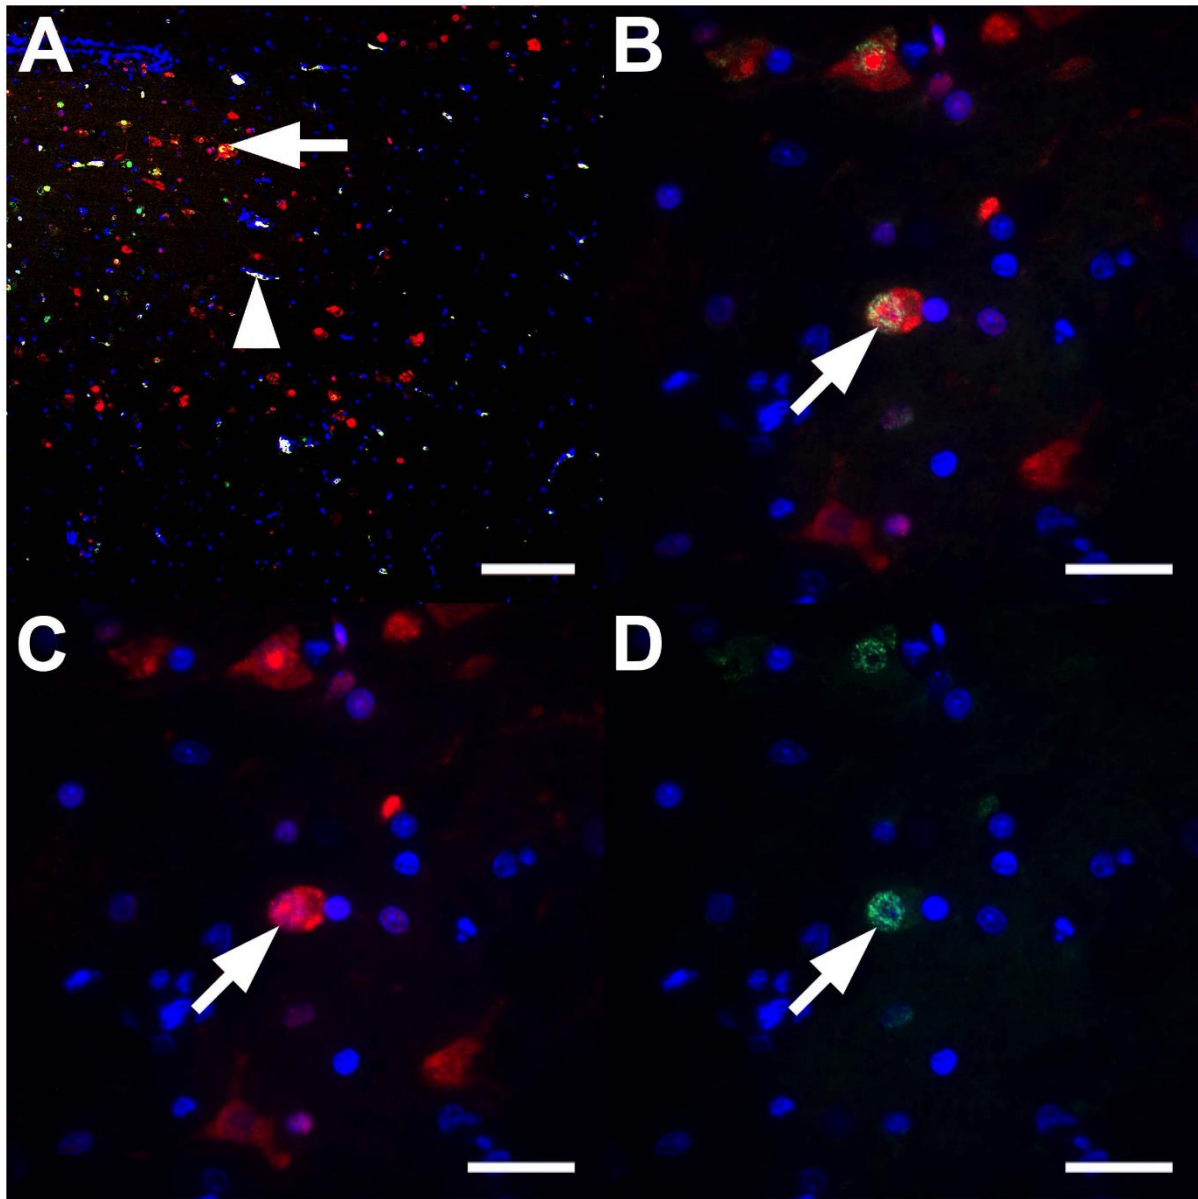

478

479 Immunofluorescence was used to proof simultaneous expression of influenza A virus  
480 non-structural antigen 1 (NS1) and matrix-1 protein (M1). The brain of a HP-NS224-  
481 infected turkey 4 dpi was immunolabelled for NS1 in red (C), M1 in green (D), both  
482 with nuclei in blue. In the merged images (A-B) colocalization of NS1 and M1 is shown  
483 in yellow and nuclei in blue. (A) The merged low magnification image of the cerebrum  
484 displays a periventricular focus (ependymal nuclei lined up like a ribbon in the upper  
485 left corner) of NS1 and M1 expression, often within polygonal cells, resembling  
486 neurons, visible as yellow double-labelling (arrow) in the merged image. The

487 arrowhead points to a vessel exhibiting intense, white, false positive autofluorescence.  
488 (B-C) A higher magnification of a group of characteristic neurons displays an equal  
489 intensity of NS1 in the cytoplasm and nucleus, as compared to a more nuclear  
490 expression of M1 (A-D) Immunofluorescence for NS1 with AlexaFlour 488-coupled  
491 secondary antibody, M1 with Alexa-456-coupled secondary antibody and nuclei with  
492 4',6-diamidino-2-phenylindole. (A) Scale bar = 100  $\mu\text{m}$ ; (B-D) scale bars = 20  $\mu\text{m}$ .



493 **References**

- 494 1. Spackman E. A Brief Introduction to Avian Influenza Virus. *Methods Mol Biol*  
495 2020; 2123:83-92.
- 496 2. Bosch FX, Orlich M, Klenk HD, Rott R. The structure of the hemagglutinin, a  
497 determinant for the pathogenicity of influenza viruses. *Virology* 1979; 95:197-207.
- 498 3. Perdue ML. Molecular Determinants of Pathogenicity for Avian Influenza  
499 Viruses. *Avian Influenza*, 2008:23-41.
- 500 4. Blaurock C, Breithaupt A, Scheibner D, Bagato O, Karger A, Mettenleiter TC,  
501 Abdelwhab EM. Preferential selection and contribution of non-structural protein 1  
502 (NS1) to the efficient transmission of panzootic avian influenza H5N8 virus clades  
503 2.3.4.4A and B in chickens and ducks. *J Virol* 2021; 95:e0044521.
- 504 5. Li Z, Jiang Y, Jiao P, Wang A, Zhao F, Tian G, et al. The NS1 gene contributes  
505 to the virulence of H5N1 avian influenza viruses. *J Virol* 2006; 80:11115-23.
- 506 6. Abdelwhab EM, Veits J, Mettenleiter TC. Avian influenza virus NS1: A small  
507 protein with diverse and versatile functions. *Virulence* 2013; 4:583-8.
- 508 7. Marc D. Influenza virus non-structural protein NS1: interferon antagonism and  
509 beyond. *J Gen Virol* 2014; 95:2594-611.
- 510 8. Hale BG, Randall RE, Ortin J, Jackson D. The multifunctional NS1 protein of  
511 influenza A viruses. *J Gen Virol* 2008; 89:2359-76.
- 512 9. Monne I, Fusaro A, Nelson MI, Bonfanti L, Mulatti P, Hughes J, et al. Emergence  
513 of a highly pathogenic avian influenza virus from a low-pathogenic progenitor. *J Virol*  
514 2014; 88:4375-88.
- 515 10. Abdelwhab ESM, Veits J, Breithaupt A, Gohrbandt S, Ziller M, Teifke JP, et al.  
516 Prevalence of the C-terminal truncations of NS1 in avian influenza A viruses and effect  
517 on virulence and replication of a highly pathogenic H7N1 virus in chickens. *Virulence*  
518 2016; 7:546-57.
- 519 11. Keiner B, Maenz B, Wagner R, Cattoli G, Capua I, Klenk HD. Intracellular  
520 distribution of NS1 correlates with the infectivity and interferon antagonism of an avian  
521 influenza virus (H7N1). *J Virol* 2010; 84:11858-65.
- 522 12. Capua I, Mutinelli F, Marangon S, Alexander DJ. H7N1 avian influenza in Italy  
523 (1999 to 2000) in intensively reared chickens and turkeys. *Avian Pathol* 2000; 29:537-  
524 43.
- 525 13. Soubies SM, Hoffmann TW, Croville G, Larcher T, Ledevin M, Soubieux D, et  
526 al. Deletion of the C-terminal ESEV domain of NS1 does not affect the replication of a  
527 low-pathogenic avian influenza virus H7N1 in ducks and chickens. *J Gen Virol* 2013;  
528 94:50-8.
- 529 14. Vergara-Alert J, Busquets N, Ballester M, Chaves AJ, Rivas R, Dolz R, et al.  
530 The NS segment of H5N1 avian influenza viruses (AIV) enhances the virulence of an  
531 H7N1 AIV in chickens. *Vet Res* 2014; 45:7.
- 532 15. FAO. FAOSTAT: Food and agricultural organization of the united nations: Live  
533 animals. Available online at: <http://www.fao.org/faostat/en/#data/QA> (last accessed  
534 14-04-2021). 2021.
- 535 16. Alexander DJ. A review of avian influenza in different bird species. *Veterinary*  
536 *microbiology* 2000; 74:3-13.
- 537 17. Spackman E, Gelb J, Jr., Preskenis LA, Ladman BS, Pope CR, Pantin-  
538 Jackwood MJ, McKinley ET. The pathogenesis of low pathogenicity H7 avian influenza  
539 viruses in chickens, ducks and turkeys. *Virol J* 2010; 7:331.

- 540 18. Abid SA, Azeem T, Ahmad W, Chaudhry ZI, Umar S. Insights into the role of  
541 turkeys as potential intermediate host for influenza viruses. *Worlds Poultry Science*  
542 *Journal* 2016; 72:585-95.
- 543 19. Pillai SPS, Pantin-Jackwood M, Yassine HM, Saif YM, Lee CW. The high  
544 susceptibility of turkeys to influenza viruses of different origins implies their importance  
545 as potential intermediate hosts. *Avian Dis* 2010; 54:522-6.
- 546 20. Scheibner D, Ulrich R, Fatola OI, Graaf A, Gischke M, Salaheldin AH, et al.  
547 Variable impact of the hemagglutinin polybasic cleavage site on virulence and  
548 pathogenesis of avian influenza H7N7 virus in chickens, turkeys and ducks. *Scientific*  
549 *Reports* 2019; 9:11556.
- 550 21. Blaurock C, Pfaff F, Scheibner D, Hoffmann B, Fusaro A, Monne I, et al.  
551 Evidence for Different Virulence Determinants and Host Response after Infection of  
552 Turkeys and Chickens with Highly Pathogenic H7N1 Avian Influenza Virus. *Journal of*  
553 *virology* 2022; 96:e0099422.
- 554 22. Trapp S, Soubieux D, Lidove A, Esnault E, Lion A, Guillory V, et al. Major  
555 contribution of the RNA-binding domain of NS1 in the pathogenicity and replication  
556 potential of an avian H7N1 influenza virus in chickens. *Virology* 2018; 15:55.
- 557 23. Post J, Peeters B, Cornelissen JB, Vervelde L, Rebel JM. Contribution of the  
558 NS1 gene of H7 avian influenza virus strains to pathogenicity in chickens. *Viral*  
559 *Immunol* 2013; 26:396-403.
- 560 24. Jang H, Ngunjiri JM, Lee C-W. Association between Interferon Response and  
561 Protective Efficacy of NS1-Truncated Mutants as Influenza Vaccine Candidates in  
562 Chickens. *PLOS ONE* 2016; 11:e0156603.
- 563 25. Kochs G, Koerner I, Thiel L, Kothlow S, Kaspers B, Ruggli N, et al. Properties  
564 of H7N7 influenza A virus strain SC35M lacking interferon antagonist NS1 in mice and  
565 chickens. *J Gen Virol* 2007; 88:1403-9.
- 566 26. Cauthen AN, Swayne DE, Sekellick MJ, Marcus PI, Suarez DL. Amelioration of  
567 influenza virus pathogenesis in chickens attributed to the enhanced interferon-  
568 inducing capacity of a virus with a truncated NS1 gene. *J Virol* 2007; 81:1838-47.
- 569 27. Soubies SM, Volmer C, Croville G, Loupias J, Peralta B, Costes P, et al.  
570 Species-specific contribution of the four C-terminal amino acids of influenza A virus  
571 NS1 protein to virulence. *J Virol* 2010; 84:6733-47.
- 572 28. Tumpey TM, Alvarez R, Swayne DE, Suarez DL. Diagnostic approach for  
573 differentiating infected from vaccinated poultry on the basis of antibodies to NS1, the  
574 nonstructural protein of influenza A virus. *J Clin Microbiol* 2005; 43:676-83.
- 575 29. Zhao S, Jin M, Li H, Tan Y, Wang G, Zhang R, Chen H. Detection of antibodies  
576 to the nonstructural protein (NS1) of avian influenza viruses allows distinction between  
577 vaccinated and infected chickens. *Avian Dis* 2005; 49:488-93.
- 578 30. Takeyama N, Minari K, Kajihara M, Isoda N, Sakamoto R, Sasaki T, et al.  
579 Detection of highly pathogenic avian influenza virus infection in vaccinated chicken  
580 flocks by monitoring antibodies against non-structural protein 1 (NS1). *Veterinary*  
581 *microbiology* 2011; 147:283-91.
- 582 31. Choi JW, Shin EK, Ha SH, Kim HA, Kim YH, Kim JS, Hahn TW. Optimal  
583 conditions for cryopreservation of primary chicken embryo kidney cells with dimethyl  
584 sulfoxide. *Mol Biotechnol* 2007; 35:237-41.
- 585 32. Blaurock C, Blohm U, Luttermann C, Holzerland J, Scheibner D, Schafer A, et  
586 al. The C-terminus of non-structural protein 1 (NS1) in H5N8 clade 2.3.4.4 avian  
587 influenza virus affects virus fitness in human cells and virulence in mice. *Emerg*  
588 *Microbes Infect* 2021; 10:1760-76.

- 589 33. WOAHO/OIE. Avian influenza. Available online at:  
590 [https://www.woah.org/fileadmin/Home/eng/Animal Health in the World/docs/pdf/2.](https://www.woah.org/fileadmin/Home/eng/Animal_Health_in_the_World/docs/pdf/2.03.04_AI.pdf)  
591 [03.04 AI.pdf](https://www.woah.org/fileadmin/Home/eng/Animal_Health_in_the_World/docs/pdf/2.03.04_AI.pdf). 2019.
- 592 34. Graaf A, Ulrich R, Maksimov P, Scheibner D, Koethe S, Abdelwhab EM, et al. A  
593 viral race for primacy: co-infection of a natural pair of low and highly pathogenic H7N7  
594 avian influenza viruses in chickens and embryonated chicken eggs. *Emerg Microbes*  
595 *Infect* 2018; 7:204.
- 596 35. Koethe S, Ulrich L, Ulrich R, Amler S, Graaf A, Harder TC, et al. Modulation of  
597 lethal HPAIV H5N8 clade 2.3.4.4B infection in AIV pre-exposed mallards. *Emerg*  
598 *Microbes Infect* 2020; 9:180-93.
- 599 36. Landmann M, Scheibner D, Graaf A, Gischke M, Koethe S, Fatola OI, et al. A  
600 semiquantitative scoring system for histopathological and immunohistochemical  
601 assessment of lesions and tissue tropism in avian influenza. *Viruses* 2021; 13.
